# Supplementary material for: Association of Dipeptidyl Peptidase-4 Inhibitors Use with Reduced Risk of Hepatocellular Carcinoma in Type 2 Diabetes Patients with Chronic HBV Infection
Source: MDPI journal article supplement (doi:10.3390/cancers15041148), 2023-02-10
Supplement: s1 [file s1]

# Supplementary Materials: Association of Dipeptidyl peptidase-4 inhibitors use with reduced risk of Hepatocellular Carcinoma in Type 2 Diabetes Patients with chronic HBV Infection

Tzu-I Chen, Fu-Jen Lee, Wan-Lun Hsu, Yong-Chen Chen and Mingchih Chen

**Table S1.** Anatomical Therapeutic Chemical classification codes for reimbursable DPP-4 inhibitors, nucleoside and nucleotide reverse transcriptase inhibitors, and insulin in Taiwan

| Name                                                              | ATC code |
|-------------------------------------------------------------------|----------|
| <b>Dipeptidyl peptidase 4 (DPP-4) inhibitors</b>                  |          |
| sitagliptin                                                       | A10BH01  |
| vildagliptin                                                      | A10BH02  |
| saxagliptin                                                       | A10BH03  |
| alogliptin                                                        | A10BH04  |
| linagliptin                                                       | A10BH05  |
| metformin and sitagliptin                                         | A10BD07  |
| metformin and vildagliptin                                        | A10BD08  |
| pioglitazone and alogliptin                                       | A10BD09  |
| metformin and saxagliptin                                         | A10BD10  |
| metformin and linagliptin                                         | A10BD11  |
| metformin and alogliptin                                          | A10BD13  |
| <b>Nucleoside and nucleotide reverse transcriptase inhibitors</b> |          |
| zidovudine                                                        | J05AF01  |
| didanosine                                                        | J05AF02  |
| stavudine                                                         | J05AF04  |
| lamivudine                                                        | J05AF05  |
| abacavir                                                          | J05AF06  |
| tenofovir disoproxil                                              | J05AF07  |
| adefovir dipivoxil                                                | J05AF08  |
| entecavir                                                         | J05AF10  |
| telbivudine                                                       | J05AF11  |
| tenofovir alafenamide                                             | J05AF13  |
| <b>Insulins and analogues</b>                                     |          |
| insulin (human)                                                   | A10AB01  |
| insulin (pork)                                                    | A10AB03  |
| insulin lispro                                                    | A10AB04  |
| insulin aspart                                                    | A10AB05  |
| insulin glulisine                                                 | A10AB06  |
| combinations                                                      | A10AB30  |
| insulin (human)                                                   | A10AC01  |
| insulin (pork)                                                    | A10AC03  |

|                                     |         |
|-------------------------------------|---------|
| combinations                        | A10AC30 |
| insulin (human)                     | A10AD01 |
| insulin (pork)                      | A10AD03 |
| insulin lispro                      | A10AD04 |
| insulin aspart                      | A10AD05 |
| insulin degludec and insulin aspart | A10AD06 |
| insulin (human)                     | A10AE01 |
| insulin glargine                    | A10AE04 |
| insulin detemir                     | A10AE05 |
| insulin degludec                    | A10AE06 |
| insulin glargine and lixisenatide   | A10AE54 |

**Table S2.** ICD codes for the diagnosis of comorbidities

| Disease               | ICD-9                                                  | ICD-10                     |
|-----------------------|--------------------------------------------------------|----------------------------|
| Type 2 Diabetes       | 250.XX                                                 | E11                        |
| Chronic HBV infection | 070.2, 070.3, V02.61                                   | B18.0, B18.1, B19.1        |
| Chronic HCV infection | 070.41, 070.44, 070.51, 070.54, 070.70, 070.71, V02.62 | B18.2, B19.2               |
| Cirrhosis             | 571.5                                                  | K74.0, K74.1, K74.2, K74.6 |

Abbreviations: HBV, hepatitis B virus; HCV, hepatitis C virus; ICD-9, International Classification of Diseases, Ninth Revision; ICD-10, International Classification of Diseases, Tenth Revision.

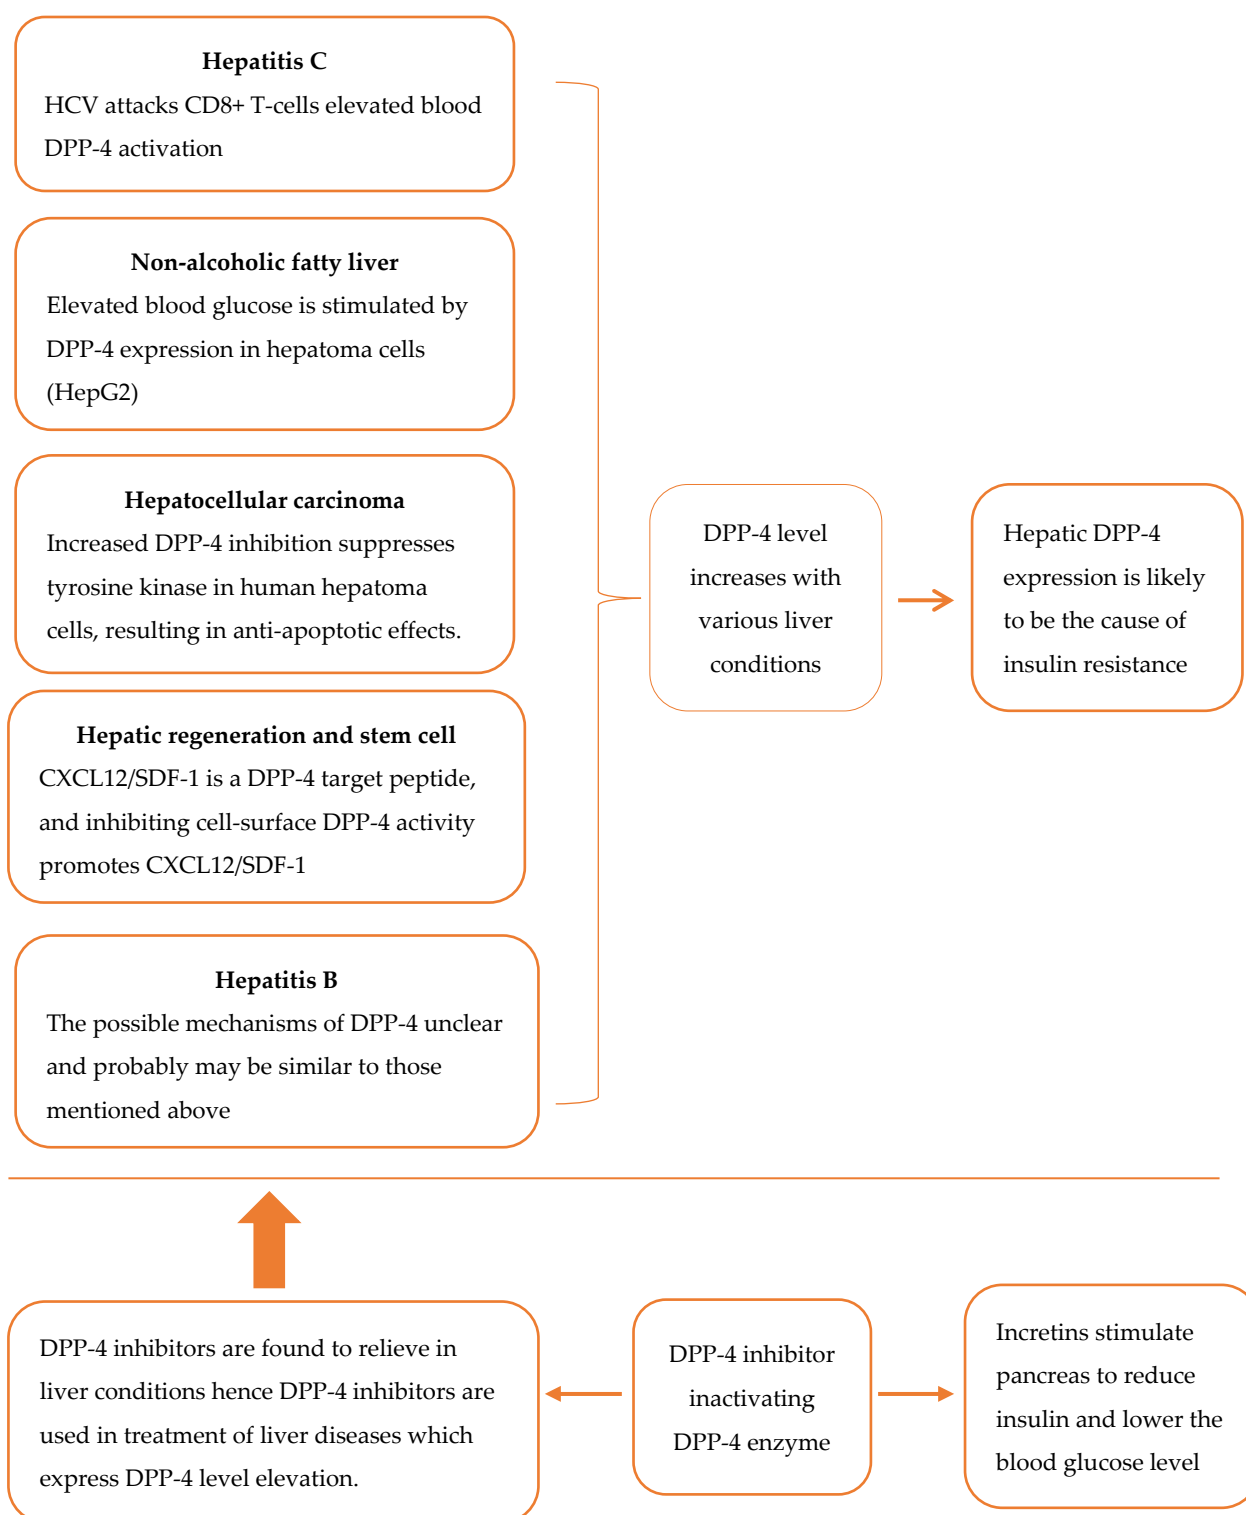

Figure S1. Mechanisms of action and management of DPP-4-related liver disease and refer to Sharma, A., et al. (2022) [39].
